# Supplementary material for: Characterizing Food Policy Councils’ Network Partnerships and COVID-19 Responses
Source: MDPI journal article supplement (doi:10.3390/nu16070915), 2024-03-22
Supplement: s1 [file s1]

## Supplementary Materials

*The following portion of the survey reflects select questions that were used for this study.*

**Does your FPC work with any of the following organizations, agencies or people on food systems concerns related to COVID-19?**

| <b>Organization</b>                                                                             | <b>FPC<br/>previously<br/>worked with<br/>group and is<br/>currently<br/>working with<br/>group</b> | <b>New<br/>relationship<br/>for FPC</b> | <b>No<br/>relationship<br/>with group</b> |
|-------------------------------------------------------------------------------------------------|-----------------------------------------------------------------------------------------------------|-----------------------------------------|-------------------------------------------|
| 1) Government agency - Emergency management services                                            |                                                                                                     |                                         |                                           |
| 2) Government agency - Planning department                                                      |                                                                                                     |                                         |                                           |
| 3) Government agency - Parks and recreation department                                          |                                                                                                     |                                         |                                           |
| 4) Government agency - School district                                                          |                                                                                                     |                                         |                                           |
| 5) Government agency - Transportation department                                                |                                                                                                     |                                         |                                           |
| 6) Government agency - Health and human or social services                                      |                                                                                                     |                                         |                                           |
| 7) Government agency - Police department                                                        |                                                                                                     |                                         |                                           |
| 8) Government agency – Agriculture                                                              |                                                                                                     |                                         |                                           |
| 9) Government agency – Environment or Sustainability                                            |                                                                                                     |                                         |                                           |
| 10) Local elected official's office (e.g., mayor, city council, county commission)              |                                                                                                     |                                         |                                           |
| 11) State elected official's office (e.g., governor, state representative or senator)           |                                                                                                     |                                         |                                           |
| 12) Federal elected official's office (e.g. staff member or aide for Senator or Representative) |                                                                                                     |                                         |                                           |
| 13) Public utilities                                                                            |                                                                                                     |                                         |                                           |
| 14) Emergency food providers (e.g., food bank, food pantry, hot meal provider)                  |                                                                                                     |                                         |                                           |

|                                                                                                                                            |  |  |  |
|--------------------------------------------------------------------------------------------------------------------------------------------|--|--|--|
| 15) Faith-based organizations                                                                                                              |  |  |  |
| 16) Restaurants                                                                                                                            |  |  |  |
| 17) Food retail stores (e.g. grocery or convenience stores, cooperative markets)                                                           |  |  |  |
| 18) Producers or direct markets for producers (e.g., farmers, ranchers, watermen, farmers markets, CSAs, farm bureau, farmer cooperatives) |  |  |  |
| 19) Food chain workers (e.g. labor unions or collectives)                                                                                  |  |  |  |
| 20) Food processors, distributors or suppliers (e.g. truck drivers, meat processing facilities)                                            |  |  |  |
| 21) Correctional facilities                                                                                                                |  |  |  |
| 22) Healthcare providers (e.g., hospitals, community clinics)                                                                              |  |  |  |
| 23) Frontline healthcare workers and first responders (i.e. EMTs)                                                                          |  |  |  |
| 24) Social justice or civil rights advocacy groups                                                                                         |  |  |  |
| 25) Assisted living facilities and nursing homes                                                                                           |  |  |  |
| 26) Banks, financial institutions or loan services                                                                                         |  |  |  |
| 27) Elementary and secondary schools                                                                                                       |  |  |  |
| 28) Colleges, universities or community colleges                                                                                           |  |  |  |
| 29) Residents or neighborhood associations                                                                                                 |  |  |  |

**Does your FPC use a racial or social equity framework or criteria when making decisions about its policy priorities or advocacy actions?**

- a. Yes
- b. No
- c. Developing criteria or framework

**What actions has your FPC taken in response to COVID-19?**

| <b>Action</b>                                                                                                                               | <b>Our FPC led this effort</b> | <b>Our FPC supported another organization's efforts</b> | <b>Our FPC has not taken action in this area</b> |
|---------------------------------------------------------------------------------------------------------------------------------------------|--------------------------------|---------------------------------------------------------|--------------------------------------------------|
| 1) Created a publicly accessible webpage with food systems information (e.g. resources, services) related to COVID-19                       |                                |                                                         |                                                  |
| 2) Created a map of food systems resources available in response to COVID-19                                                                |                                |                                                         |                                                  |
| 3) Created a dashboard to track food systems related trends in response to COVID-19                                                         |                                |                                                         |                                                  |
| 4) Used social media (e.g., Twitter and Facebook) to share real-time information about the status of food systems resources during COVID-19 |                                |                                                         |                                                  |
| 5) Held community meeting(s) related to COVID-19                                                                                            |                                |                                                         |                                                  |
| 6) Collected data related to food and farm systems needs due to COVID-19                                                                    |                                |                                                         |                                                  |
| 7) Held regular meetings between food systems sector representatives about responses to COVID-19                                            |                                |                                                         |                                                  |
| 8) Facilitated connections across food systems sectors to match resources with needs to respond to COVID-19                                 |                                |                                                         |                                                  |
| 9) Educated the public about food systems challenges due to COVID-19                                                                        |                                |                                                         |                                                  |
| 10) Advocated for local, state, tribal or federal policies related to community food and farm systems concerns due to COVID-19              |                                |                                                         |                                                  |

|                                                                                                                                       |  |  |  |
|---------------------------------------------------------------------------------------------------------------------------------------|--|--|--|
| 11) Met with government staff and/or elected officials to discuss food systems issues related to COVID-19                             |  |  |  |
| 12) Worked with government staff and/or elected officials to provide funding for needed food systems services in response to COVID-19 |  |  |  |
| 13) Worked with community partners to raise funds for needed food systems services in response to COVID-19                            |  |  |  |

**Please describe other actions your FPC has taken in response to COVID-19 that were not listed in the chart above:**

**Which areas has your FPC helped to develop or advocated for policies in response to COVID-19, either directly or by supporting efforts led by another organization?**

|                                                                                                                 | <b>Our FPC led or supported policy changes in this issue area</b> | <b>Did not work on policy changes in this issue area</b> |
|-----------------------------------------------------------------------------------------------------------------|-------------------------------------------------------------------|----------------------------------------------------------|
| 1) Emergency food providers (e.g., food banks, pantries)                                                        |                                                                   |                                                          |
| 2) Food producers (e.g., farmers, ranchers, watermen)                                                           |                                                                   |                                                          |
| 3) Food chain workers and other essential workers (e.g., farmworkers, processing workers, food service workers) |                                                                   |                                                          |
| 4) Direct markets for local producers (e.g., farmers markets, farm stands or CSAs)                              |                                                                   |                                                          |
| 5) Federal food and nutrition assistance programs                                                               |                                                                   |                                                          |
| 6) Federal child nutrition programs (e.g., school meals, summer meals, WIC, SNAP)                               |                                                                   |                                                          |

|                                                                     |  |  |
|---------------------------------------------------------------------|--|--|
| 7) Food processing and distribution                                 |  |  |
| 8) Food procurement                                                 |  |  |
| 9) Food safety                                                      |  |  |
| 10) Restaurants and food service establishments                     |  |  |
| 11) Food retail stores                                              |  |  |
| 12) Institutions (e.g., schools, hospitals, jails)                  |  |  |
| 13) Urban agriculture or community gardens                          |  |  |
| 14) Access to credit or Small Business Administration loan programs |  |  |
| 15) Funding for critical food systems needs                         |  |  |

**Please describe other areas that your FPC has helped to develop or advocated for policies in response to COVID that were not listed in the chart above:**

**What advocacy actions has your FPC taken in response to COVID-19?**

- 1) Provided policy recommendations to policy makers
- 2) Supported or directed a campaign to advocate for a specific policy change
- 3) Submitted written testimony
- 4) Submitted comments on regulatory changes
- 5) Provided oral testimony
- 6) Met with policy makers
- 7) Made calls to policy makers
- 8) Reviewed and commented on draft legislation
- 9) Supported a partner organization's policy agenda by signing onto a letter or providing testimony
- 10) Surveyed policymakers about food system issue(s)
- 11) Educated public about policy issues or candidates
- 12) Hosted candidate forum
- 13) Provide analysis or research on specific legislation
- 14) Other (please explain): \_\_\_\_\_
- 15) None (only select if none of the above options selected)
